# Supplementary material for: The Effect of Formulation Variables on the Manufacturability of Clopidogrel Tablets via Fluidized Hot-Melt Granulation—From the Lab Scale to the Pilot Scale
Source: MDPI journal article supplement (doi:10.3390/pharmaceutics16030391), 2024-03-13
Supplement: s1 [file s1]

## Supplementary Material S1

**Table S1.** Database used for multivariate data analysis.

| Primary ID | Class ID | Granulation temperature<br>(°C) | Granulation time (min) | Macrogol type | Kolliwax content (%)              | Loss on drying (%) | Bulk density (g/100 mL)                  | Flow-out time (sec/100 g) | Particle size distribution, wt.% retained<br>on sieve (µm) |     |      |      |      |      | Compression force, core<br>(kN)        | Resistance to crushing,<br>core (N) | Disintegration time, core<br>(sec) | Resistance to crushing,<br>fct. (N) | Disintegration time, fct.<br>(sec) |
|------------|----------|---------------------------------|------------------------|---------------|-----------------------------------|--------------------|------------------------------------------|---------------------------|------------------------------------------------------------|-----|------|------|------|------|----------------------------------------|-------------------------------------|------------------------------------|-------------------------------------|------------------------------------|
|            |          |                                 |                        |               |                                   |                    |                                          |                           | > 1000                                                     | 800 | 400  | 200  | 80   | < 80 |                                        |                                     |                                    |                                     |                                    |
| L1         | ED       | 50                              | 5                      | PEG8000P      | These batches were not lubricated | 0.33               | This set-point resulted in batch failure |                           |                                                            |     |      |      |      |      | Batches were not compressed to tablets |                                     |                                    |                                     |                                    |
| L2         | ED       | 65                              | 5                      | PEG8000P      |                                   | 0.53               | 58.6                                     | 14                        | 22.7                                                       | 9.9 | 24.2 | 24.9 | 18   | 0.4  |                                        |                                     |                                    |                                     |                                    |
| L3         | ED       | 50                              | 30                     | PEG8000P      |                                   | 0.46               | 57.2                                     | -                         | 0.0                                                        | 0   | 1.7  | 14.2 | 40.1 | 42.8 |                                        |                                     |                                    |                                     |                                    |
| L4         | ED       | 65                              | 30                     | PEG8000P      |                                   | 0.40               | 54.2                                     | 13                        | 0.4                                                        | 7.2 | 37.3 | 42.1 | 11.8 | 0.4  |                                        |                                     |                                    |                                     |                                    |
| L5         | ED       | 50                              | 5                      | PEG6000P      |                                   | 0.23               | 58.2                                     | -                         | 0.2                                                        | 0.1 | 1.8  | 16.1 | 38.4 | 42.6 |                                        |                                     |                                    |                                     |                                    |
| L6         | ED       | 65                              | 5                      | PEG6000P      |                                   | 0.47               | 53.6                                     | 13                        | 0.6                                                        | 7.1 | 36   | 36.3 | 19.5 | 0.5  |                                        |                                     |                                    |                                     |                                    |
| L7         | ED       | 50                              | 30                     | PEG6000P      |                                   | 0.23               | 59.5                                     | 42                        | 0.2                                                        | 0.2 | 2.2  | 23   | 40.1 | 33.6 |                                        |                                     |                                    |                                     |                                    |
| L8         | ED       | 65                              | 30                     | PEG6000P      |                                   | 0.43               | 54.4                                     | 13                        | 1.9                                                        | 4.2 | 25.2 | 36.8 | 31.1 | 0.7  |                                        |                                     |                                    |                                     |                                    |
| L9         | ED       | 50                              | 5                      | PEG8000C      |                                   | 0.46               | 58.7                                     | 11                        | 15.4                                                       | 9.2 | 24.9 | 20   | 28.8 | 1.7  |                                        |                                     |                                    |                                     |                                    |
| L10        | ED       | 65                              | 5                      | PEG8000C      |                                   | 0.43               | 57.2                                     | -                         | 0.5                                                        | 0.8 | 5.7  | 12.1 | 38.8 | 41.5 |                                        |                                     |                                    |                                     |                                    |
| L11        | ED       | 50                              | 30                     | PEG8000C      |                                   | 0.53               | 55.1                                     | -                         | 0.0                                                        | 0.2 | 1.5  | 23.1 | 34.8 | 39.7 |                                        |                                     |                                    |                                     |                                    |
| L12        | ED       | 65                              | 30                     | PEG8000C      |                                   | 0.50               | 57.1                                     | -                         | 0.1                                                        | 0.2 | 1.6  | 16.9 | 41.4 | 39.4 |                                        |                                     |                                    |                                     |                                    |
| L13        | ED       | 57.5                            | 17.5                   | PEG8000P      |                                   | 0.50               | 52.3                                     | 13                        | 2.6                                                        | 5.2 | 42.2 | 45.3 | 4.6  | 0.5  |                                        |                                     |                                    |                                     |                                    |
| L14        | ED       | 57.5                            | 17.5                   | PEG8000P      |                                   | 0.40               | 56.9                                     | -                         | 0.2                                                        | 0.2 | 1.7  | 20.6 | 40.8 | 36   |                                        |                                     |                                    |                                     |                                    |
| L15        | ED       | 57.5                            | 17.5                   | PEG8000P      |                                   | 0.17               | 56.1                                     | -                         | 0.0                                                        | 0.1 | 1.4  | 12.8 | 40.1 | 44.7 |                                        |                                     |                                    |                                     |                                    |
| L16        | ED-L     | 65                              | 10                     | PEG8000P      | 1.67                              | 0.44               | 51.6                                     | 13                        | 0.5                                                        | 4.2 | 23.3 | 43.4 | 26.6 | 1.2  | 16.5                                   | 117                                 | 977                                | 128                                 | 943                                |
| L17        | ED-L     | 65                              | 10                     | PEG6000P      | 1.67                              | 0.44               | 54.2                                     | 13                        | 0.2                                                        | 5.6 | 33.2 | 36.4 | 22.8 | 0.8  | 16.5                                   | 113                                 | 690                                | 126                                 | 882                                |
| L18        | ED-L     | 65                              | 10                     | PEG8000P      | 1.33                              | 0.34               | 53.3                                     | 13                        | 0.2                                                        | 2.4 | 21   | 44.4 | 29.8 | 1.2  | 16.5                                   | 130                                 | 732                                | 132                                 | 874                                |
| L19        | ED-L     | 65                              | 10                     | PEG8000P      | 2.00                              | 0.34               | 53.3                                     | 13                        | 0.2                                                        | 2.4 | 21   | 44.4 | 29.8 | 1.2  | 16.5                                   | 127                                 | 1092                               | 120                                 | 1227                               |

|      |       |    |    |          |      |      |      |    |     |     |      |      |      |      |      |     |                                     |                                           |      |
|------|-------|----|----|----------|------|------|------|----|-----|-----|------|------|------|------|------|-----|-------------------------------------|-------------------------------------------|------|
| L20  | ED-L  | 65 | 10 | PEG6000P | 1.33 | 0.42 | 54.1 | 13 | 0.2 | 6.4 | 29.6 | 36.4 | 25.8 | 0    | 16.5 | 120 | 877                                 | 116                                       | 621  |
| L21  | ED-L  | 65 | 10 | PEG6000P | 1.33 | 0.4  | 51.6 | 13 | 0.4 | 3   | 20.6 | 46.2 | 27.2 | 1.6  | 15.5 | 124 | 878                                 | 124                                       | 979  |
| L22  | ED-L  | 65 | 10 | PEG6000P | 1.33 | 0.36 | 55.3 | 12 | 0.2 | 5.2 | 26.6 | 40.6 | 25.8 | 1.4  | 15.5 | 117 | 654                                 | 126                                       | 932  |
| L23  | ED-L  | 65 | 10 | PEG6000P | 1.33 | 0.36 | 54   | 12 | 0.2 | 3.3 | 27.2 | 33.4 | 30.4 | 2    | 15.5 | 119 | 873                                 | 124                                       | 1011 |
| L24  | ED-L  | 65 | 10 | PEG8000P | 1.33 | 0.32 | 52.7 | 12 | 0.4 | 3.6 | 22.4 | 38.4 | 32.2 | 1.2  | 16   | 120 | 683                                 | 127                                       | 673  |
| L25  | ED-L  | 65 | 10 | PEG6000P | 1.33 | 0.48 | 56.6 | 12 | 0.6 | 9.8 | 29.8 | 29.6 | 29.2 | 1.8  | 16   | 113 | 751                                 | 121                                       | 776  |
| P1.1 | P     | 65 | 10 | PEG6000P | 1.33 | 0.36 | 58   | 12 | 2.2 | 7.7 | 25.4 | 22.2 | 38.7 | 2.7  | 10   | 109 | 630                                 | This batch was<br>not film-coated         |      |
| P1.2 | P     | 65 | 10 | PEG6000P | 1.33 | 0.36 | 58   | 12 | 2.2 | 7.7 | 25.4 | 22.2 | 38.7 | 2.7  | 12   | 116 | 630                                 |                                           |      |
| P1.3 | P     | 65 | 10 | PEG6000P | 1.33 | 0.36 | 58   | 12 | 2.2 | 7.7 | 25.4 | 22.2 | 38.7 | 2.7  | 14   | 125 | 630                                 |                                           |      |
| P1.4 | P     | 65 | 10 | PEG6000P | 1.33 | 0.36 | 58   | 12 | 2.2 | 7.7 | 25.4 | 22.2 | 38.7 | 2.7  | 16   | 124 | 720                                 |                                           |      |
| P1.5 | P     | 65 | 10 | PEG6000P | 1.33 | 0.36 | 58   | 12 | 2.2 | 7.7 | 25.4 | 22.2 | 38.7 | 2.7  | 18   | 129 | 720                                 |                                           |      |
| P1.6 | P     | 65 | 10 | PEG6000P | 1.33 | 0.36 | 58   | 12 | 2.2 | 7.7 | 25.4 | 22.2 | 38.7 | 2.7  | 20   | 127 | 750                                 |                                           |      |
| P2.1 | P     | 65 | 10 | PEG6000P | 1.33 | 0.44 | 66   | 13 | 0.0 | 3.7 | 24.6 | 19   | 47.7 | 4.3  | 15   | 136 | Inappropriate tablet<br>compression |                                           |      |
| P2.2 | P     | 65 | 10 | PEG6000P | 1.33 | 0.44 | 66   | 13 | 0.0 | 3.7 | 24.6 | 19   | 47.7 | 4.3  | 16   | 139 |                                     |                                           |      |
| P2.3 | P-DIS | 65 | 10 | PEG6000P | 1.33 | 0.44 | 66   | 13 | 0.0 | 3.7 | 24.6 | 19   | 47.7 | 4.3  | 18   | 138 | 720                                 | 148                                       | 900  |
| P2.4 | P-DIS | 65 | 10 | PEG6000P | 1.33 | 0.44 | 66   | 13 | 0.0 | 3.7 | 24.6 | 19   | 47.7 | 4.3  | 20   | 147 | 810                                 | 146                                       | 900  |
| P3.1 | P     | 60 | 10 | PEG8000P | 1.33 | 0.52 | 59.6 | 20 | 0.0 | 0   | 7.3  | 26.8 | 43.2 | 20.8 | 16   | 116 | 690                                 |                                           |      |
| P3.2 | P-DIS | 60 | 10 | PEG8000P | 1.33 | 0.52 | 59.6 | 20 | 0.0 | 0   | 7.3  | 26.8 | 43.2 | 20.8 | 18   | 124 | 720                                 | 130                                       | 810  |
| P3.3 | P-DIS | 60 | 10 | PEG8000P | 1.33 | 0.52 | 59.6 | 20 | 0.0 | 0   | 7.3  | 26.8 | 43.2 | 20.8 | 20   | 125 | 720                                 | 137                                       | 810  |
| P3.4 | P     | 60 | 10 | PEG8000P | 1.33 | 0.52 | 59.6 | 20 | 0.0 | 0   | 7.3  | 26.8 | 43.2 | 20.8 | 22   | 118 | 720                                 | These samples<br>were not film-<br>coated |      |
| P3.5 | P     | 60 | 10 | PEG8000P | 1.33 | 0.52 | 59.6 | 20 | 0.0 | 0   | 7.3  | 26.8 | 43.2 | 20.8 | 24   | 123 | 720                                 |                                           |      |
| P4.1 | P-DIS | 60 | 10 | PEG6000P | 1.33 | 0.58 | 63.6 | 19 | 0.0 | 0   | 14.6 | 16.2 | 52.7 | 15.7 | 18   | 123 | 780                                 | 138                                       | 1020 |
| P4.2 | P-DIS | 60 | 10 | PEG6000P | 1.33 | 0.58 | 63.6 | 19 | 0.0 | 0   | 14.6 | 16.2 | 52.7 | 15.7 | 20   | 125 | 780                                 | 135                                       | 1020 |
| P5   | P-DIS | 60 | 10 | PEG8000P | 1.33 | 0.63 | 60   | 13 | 0.0 | 0   | 21.5 | 23.6 | 43.2 | 10.8 | 20   | 134 | 720                                 | 139                                       | 900  |
| P6   | P-DIS | 60 | 10 | PEG8000P | 1.33 | 0.58 | 60   | 12 | 0.0 | 3.7 | 25.2 | 24.1 | 41.7 | 4.8  | 20   | 139 | 720                                 | 139                                       | 900  |
| P7   | P-DIS | 60 | 10 | PEG8000P | 1.33 | 0.64 | 60   | 12 | 0.0 | 3.7 | 23.7 | 22.8 | 42.4 | 6.8  | 20   | 137 | 720                                 | 147                                       | 900  |

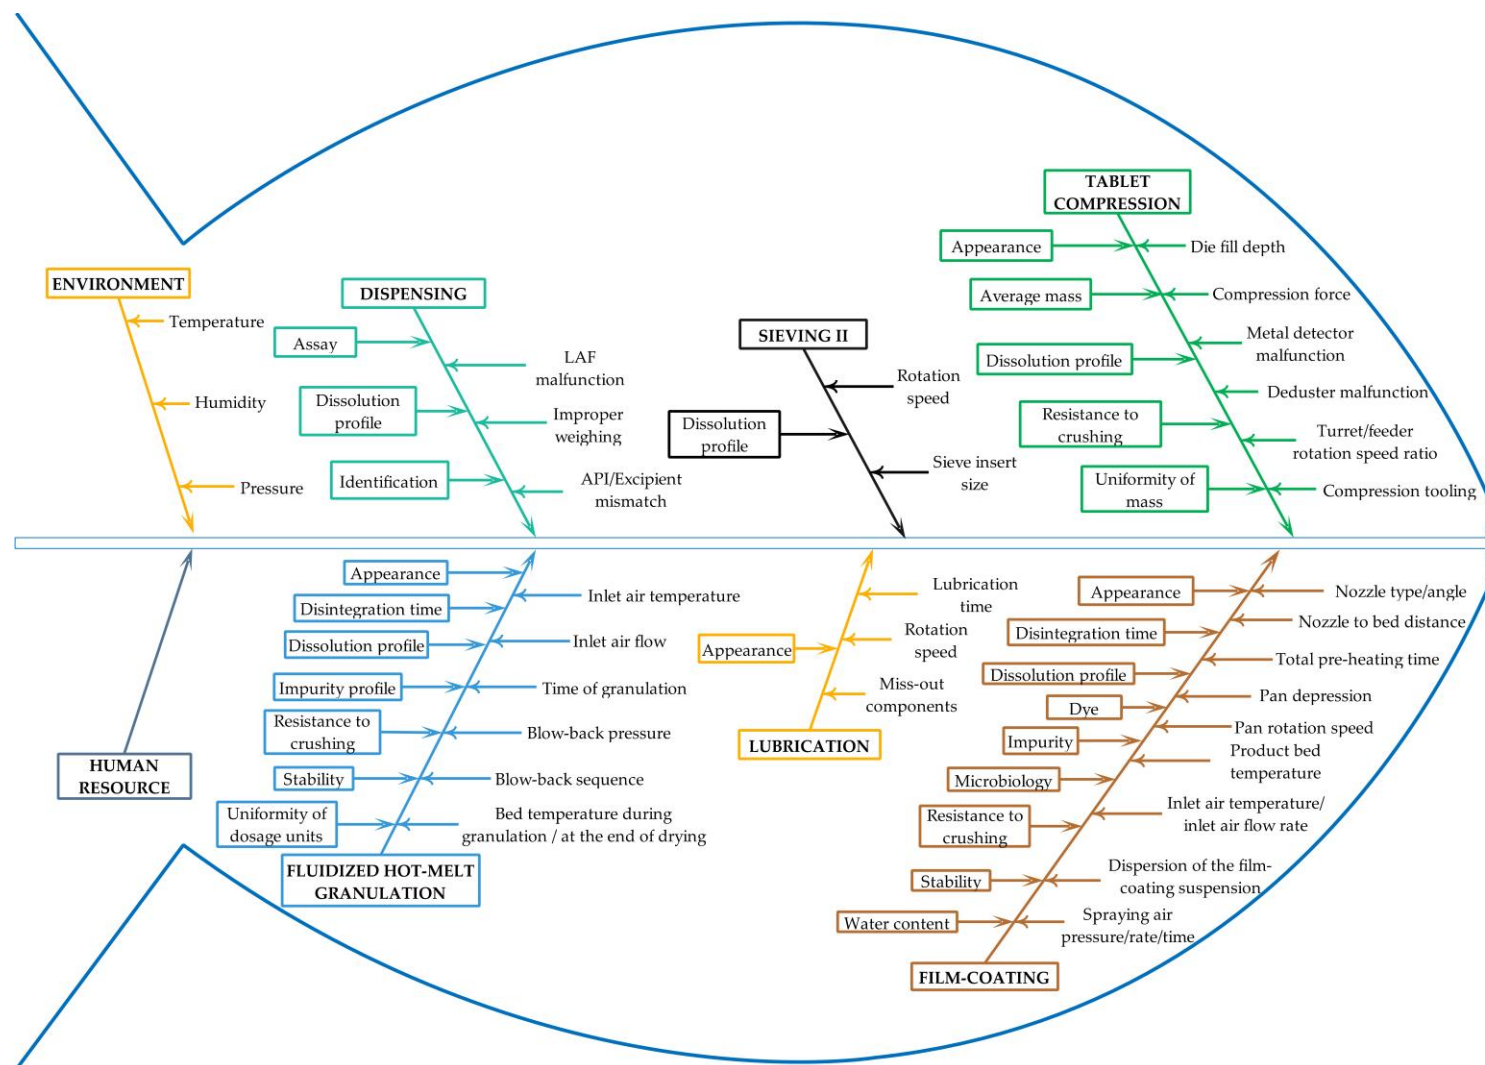

**Supplementary Figure S1.** Ishikawa Chart presenting the most important factors taken into consideration that might influence product performance.

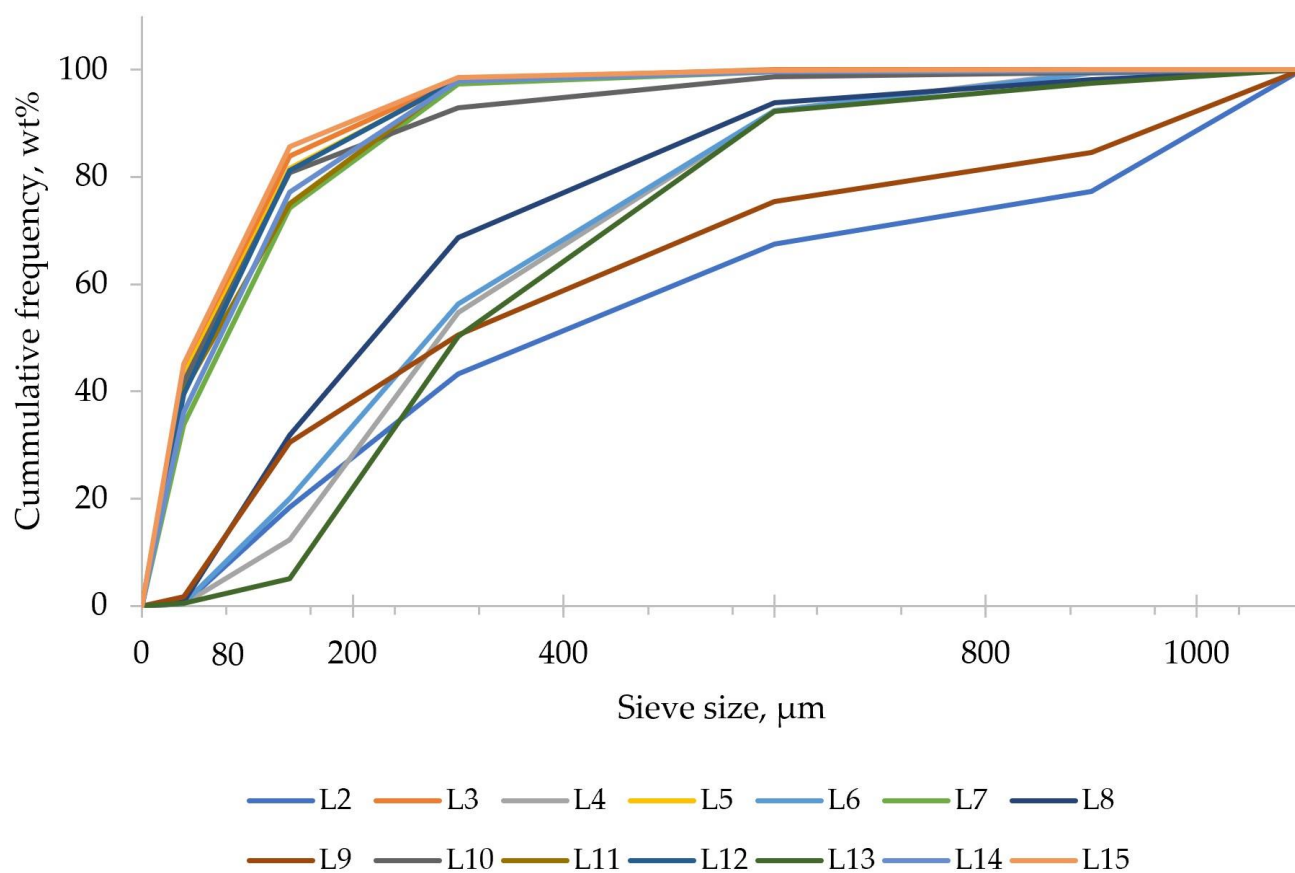

**Supplementary Figure S2.** Granulometric distribution of laboratory scale batches

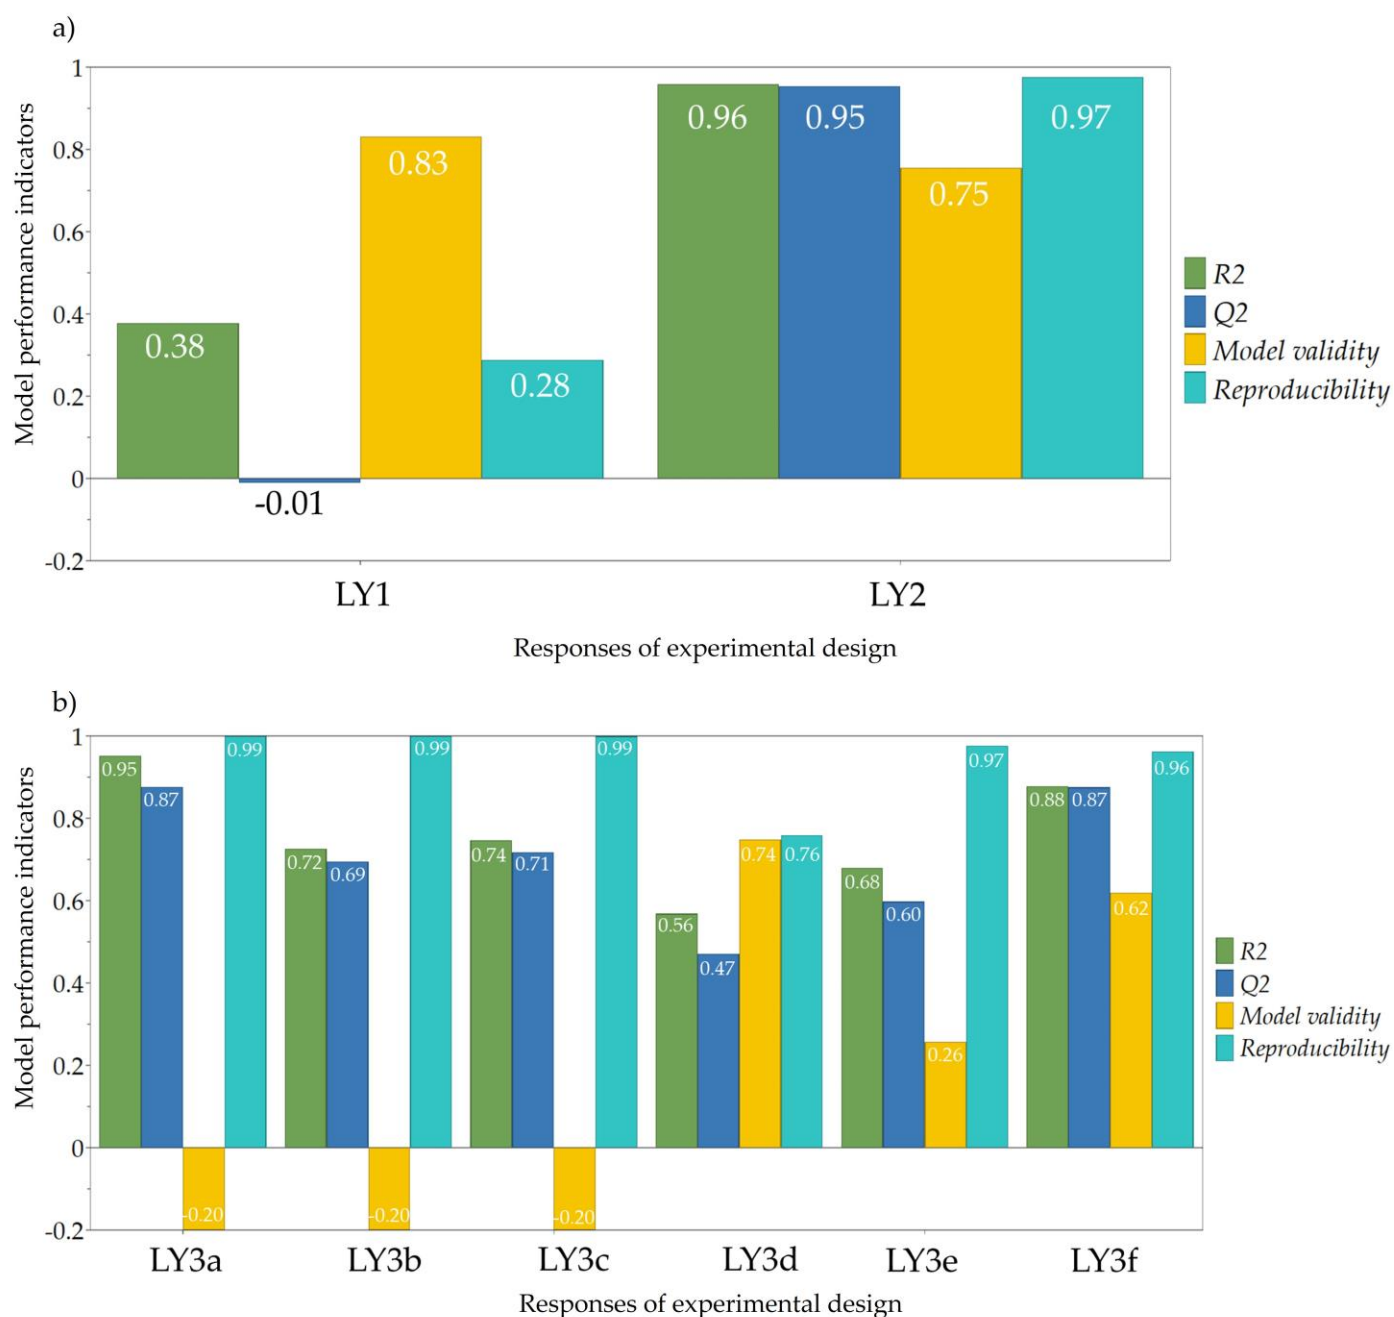

**Supplementary Figure S3.** Illustration of the product performance indicators for a) bulk density (LY1), flow-out time (LY2) and b) particle size distribution (LY3a-LY3b)

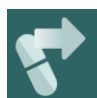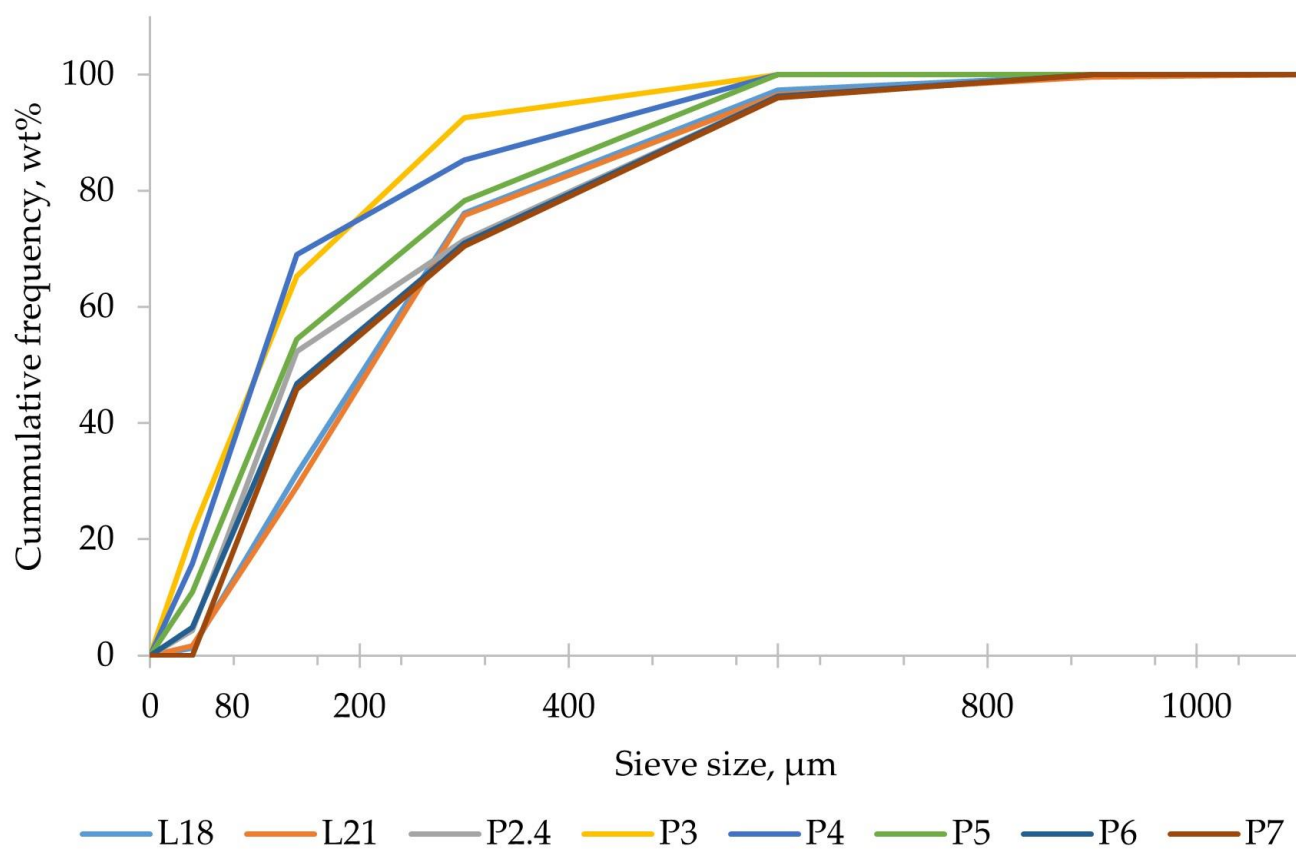

**Supplementary Figure S4.** Granulometric distribution of laboratory vs. pilot scale batches

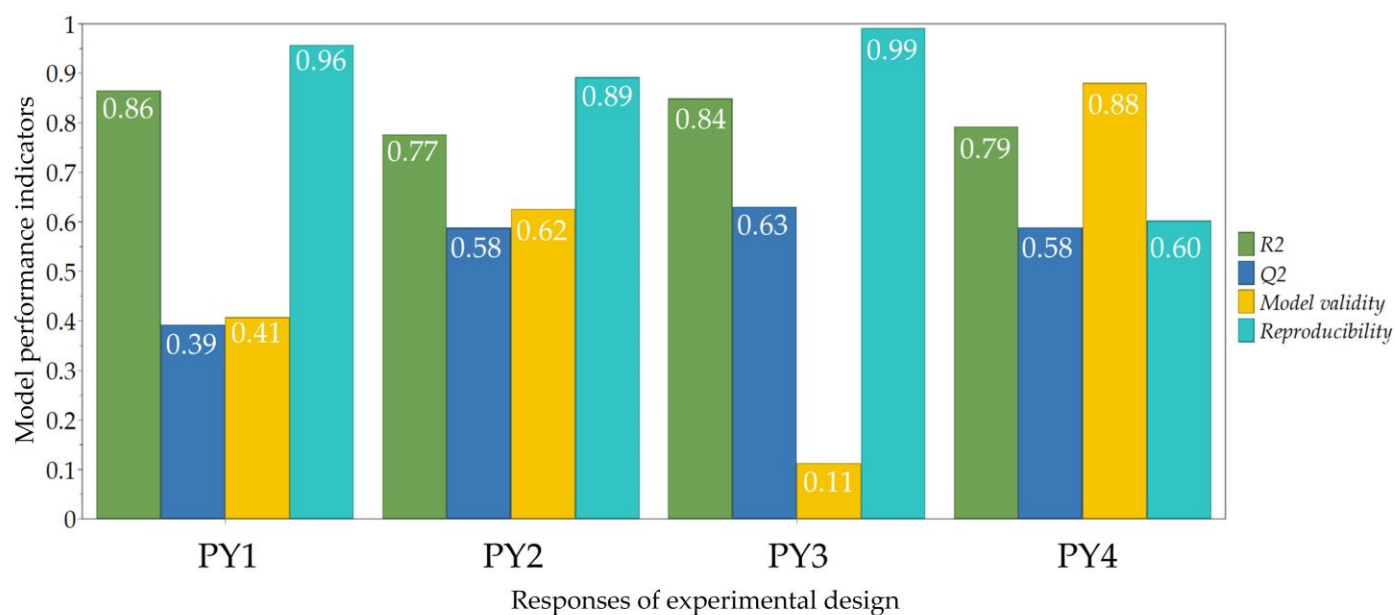

**Supplementary Figure S5.** Illustration of model performance indicators in case of experimental design for tablet compression. PY1 – Disintegration time, PY2 – Cpk, PY3 – Resistance to crushing, PY4 - Friability
